# Supplementary material for: Dynamic Decrease in Eosinophil After Intravenous Thrombolysis Predicts Poor Prognosis of Acute Ischemic Stroke: A Longitudinal Study
Source: PubMed Central journal article supplement (PMC8293745; doi:10.3389/fimmu.2021.709289), 2021-07-07
Supplement: DataSheet_1.pdf [file DataSheet_1.pdf]

**Supplementary Table 1.** Demographic and Clinical Characteristics of Patients before Excluded Missing Data.

|                                 | Available cases | Values                 |
|---------------------------------|-----------------|------------------------|
| Demographic data                |                 |                        |
| Age (years)                     | 783             | 67.15 ± 12.90          |
| Sex (male, n.%)                 | 783             | 502 (64.11)            |
| Risk factors                    |                 |                        |
| Smoking (n.%)                   | 783             | 198 (25.29)            |
| Hypertension (n.%)              | 783             | 460 (58.75)            |
| Diabetes (n.%)                  | 783             | 140 (17.88)            |
| Atrial fibrillation (n.%)       | 783             | 103 (13.15)            |
| Previous stroke (n.%)           | 783             | 87 (11.11)             |
| Laboratory findings             |                 |                        |
| Total cholesterol (mmol/L)      | 718             | 4.76 ± 1.20            |
| Triglycerides (mmol/L)          | 718             | 1.65 ± 1.31            |
| HDL cholesterol (mmol/L)        | 718             | 1.10 ± 0.26            |
| LDL cholesterol (mmol/L)        | 718             | 2.91 ± 0.89            |
| HbA1c values (%)                | 658             | 6.51 ± 1.39            |
| Eosinophil (admission)          | 733             | 0.10 (0.05-0.16)       |
| Eosinophil (24 hours)           | 739             | 0.07 (0.02-0.13)       |
| Eosinophil (percent changes, %) | 695             | -25.00 (-69.57-+14.29) |
| NLR (admission)                 | 733             | 2.25 (1.50-3.63)       |
| NLR (24 hours)                  | 739             | 3.38 (2.33-5.33)       |
| NLR (percent changes, %)        | 695             | +41.03 (-5.43-+127.47) |
| Blood pressure                  |                 |                        |
| Systolic blood pressure (mmHg)  | 747             | 160.16 ± 25.19         |
| Diastolic blood pressure (mmHg) | 747             | 89.95 ± 15.24          |
| Clinical characteristics        |                 |                        |
| Premorbid mRS 0-1, n (%)        | 747             | 716 (95.85)            |
| Admission NIHSS scores          | 752             | 6 (4-11)               |
| TOAST subtypes, n (%)           | 748             |                        |
| Cardioembolism                  |                 | 219 (29.28)            |
| Large artery atherosclerosis    |                 | 319 (42.65)            |
| Small artery occlusion          |                 | 129 (17.25)            |
| Other/undetermined              |                 | 81 (10.83)             |
| Outcome measures                | 690             |                        |

|                     |             |
|---------------------|-------------|
| Poor outcome, n (%) | 193 (27.97) |
| Death, n (%)        | 69 (10.00)  |

---

Abbreviations: HbA1c, glycated hemoglobin; NIHSS, National Institute of Health Stroke Scale.  
NLR, neutrophil-to-lymphocyte ratio; mRS, modified Rankin Scale

**Supplementary Table 2.** Demographic and Clinical Characteristics of Included Patients from Different Centers.

|                                 | <b>Center A</b><br>(n = 392) | <b>Center B</b><br>(n = 231) | <i>p</i> value |
|---------------------------------|------------------------------|------------------------------|----------------|
| Demographic data                |                              |                              |                |
| Age (years)                     | 67.69 ± 13.16                | 66.80 ± 12.27                | 0.404          |
| Sex (male, n.%)                 | 259 (66.07)                  | 144 (62.33)                  | 0.346          |
| Risk factors                    |                              |                              |                |
| Smoking (n.%)                   | 106 (27.04)                  | 60 (25.97)                   | 0.771          |
| Hypertension (n.%)              | 245 (62.50)                  | 131 (56.70)                  | 0.154          |
| Diabetes (n.%)                  | 76 (19.39)                   | 37 (16.02)                   | 0.292          |
| Atrial fibrillation (n.%)       | 76 (19.39)                   | 11 (4.76)                    | < 0.001        |
| Previous stroke (n.%)           | 47 (11.99)                   | 20 (8.65)                    | 0.195          |
| Laboratory findings             |                              |                              |                |
| Total cholesterol (mmol/L)      | 4.63 ± 1.06                  | 5.14 ± 1.17                  | < 0.001        |
| Triglycerides (mmol/L)          | 1.53 ± 1.13                  | 1.69 ± 1.34                  | 0.101          |
| HDL cholesterol (mmol/L)        | 1.09 ± 0.26                  | 1.11 ± 0.25                  | 0.265          |
| LDL cholesterol (mmol/L)        | 2.94 ± 0.92                  | 2.88 ± 0.86                  | 0.445          |
| HbA1c values (%)                | 6.51 ± 1.35                  | 6.52 ± 1.53                  | 0.484          |
| Blood pressure                  |                              |                              |                |
| Systolic blood pressure (mmHg)  | 160.00 ± 24.97               | 158.33 ± 24.45               | 0.426          |
| Diastolic blood pressure (mmHg) | 89.24 ± 15.27                | 90.11 ± 15.05                | 0.500          |
| Clinical characteristics        |                              |                              |                |
| Onset to treatment (min)        | 153 (121-200)                | 167 (122-209)                | 0.062          |
| Premorbid mRS 0-1, n (%)        | 374 (95.41)                  | 222 (96.10)                  | 0.680          |
| ASPECTS                         | 10 (9-10)                    | NA                           |                |
| Admission NIHSS scores          | 7 (5-11)                     | 5 (3-8)                      | < 0.001        |
| TOAST subtypes, n (%)           |                              |                              | < 0.001        |
| Cardioembolism                  | 133 (33.93)                  | 54 (23.38)                   |                |
| Large artery atherosclerosis    | 154 (39.29)                  | 108 (46.75)                  |                |
| Small artery occlusion          | 56 (14.29)                   | 54 (23.38)                   |                |
| Other/undetermined              | 49 (12.50)                   | 15 (6.49)                    |                |

Abbreviations: HbA1c, glycated hemoglobin; ASPECTS: Alberta Stroke Program Early CT score; mRS, modified Rankin Scale; NIHSS, National Institute of Health Stroke Scale.

Center A: The Third Affiliated Hospital of Wenzhou Medical University;

Center B: The First Affiliated Hospital of Wenzhou Medical University

**Supplementary Table 3.** Univariable Logistic Regression of Parameters Associated with Functional Outcomes

|                          | Poor Outcome         |                | Death                |                |
|--------------------------|----------------------|----------------|----------------------|----------------|
|                          | Odds ratios (95% CI) | <i>p</i> value | Odds ratios (95% CI) | <i>p</i> value |
| Age (years)              | 1.062 (1.044-1.080)  | < 0.001        | 1.117 (1.080-1.154)  | < 0.001        |
| Sex (male)               | 0.592 (0.412-0.851)  | 0.005          | 0.419 (0.240-0.720)  | 0.002          |
| Current smoking          | 0.489 (0.313-0.766)  | 0.002          | 0.312 (0.131-0.743)  | 0.009          |
| Hypertension             | 2.156 (1.462-3.180)  | < 0.001        | 1.271 (0.711-2.271)  | 0.419          |
| Diabetes                 | 1.423 (0.916-2.211)  | 0.116          | 0.751 (0.344-1.636)  | 0.470          |
| Atrial fibrillation      | 2.060 (1.286-3.301)  | 0.003          | 2.872 (1.525-5.407)  | 0.001          |
| Previous stroke          | 2.154 (1.278-3.630)  | 0.004          | 1.720 (0.801-3.694)  | 0.164          |
| Total cholesterol        | 0.968 (0.823-1.140)  | 0.698          | 0.874 (0.669-1.141)  | 0.321          |
| Triglycerides            | 0.736 (0.687-0.923)  | 0.008          | 0.559 (0.351-0.890)  | 0.014          |
| HDL cholesterol          | 1.464 (0.725-2.954)  | 0.288          | 1.656 (0.553-4.958)  | 0.367          |
| LDL cholesterol          | 1.061 (0.866-1.302)  | 0.566          | 0.900 (0.635-1.255)  | 0.534          |
| Systolic blood pressure  | 1.010 (1.003-1.018)  | 0.005          | 1.006 (0.995-1.017)  | 0.295          |
| Diastolic blood pressure | 0.995 (0.983-1.007)  | 0.390          | 0.998 (0.979-1.016)  | 0.805          |
| ASPECTS                  | 0.523 (0.411-0.665)  | < 0.001        | 0.476 (0.360-0.629)  | < 0.001        |
| Admission NIHSS scores   | 1.250 (1.199-1.303)  | < 0.001        | 1.287 (1.217-1.362)  | < 0.001        |

Abbreviations: ASPECTS: Alberta Stroke Program Early CT score; NIHSS, National Institute of Health Stroke Scale.

ASPECTS was only available in Center A.

**Supplementary Table 4.** Adjusted Odds Ratios of Adverse Outcomes According to Eosinophil changes After Intravenous Thrombolysis (Center A with ASPECTS recorded)

| Outcomes           | Increase or<br>no change<br>(n = 135) | 0 < decrease<br>≤ 25%<br>(n = 64) | 25% < decrease<br>≤ 50%<br>(n = 61) | 50% < decrease<br>≤ 75%<br>(n = 42) | 75% < decrease<br>≤ 100%<br>(n = 90) | Each 10% decrease in<br>Eosinophils |
|--------------------|---------------------------------------|-----------------------------------|-------------------------------------|-------------------------------------|--------------------------------------|-------------------------------------|
| Poor outcome (n.%) | 19 (14.07)                            | 11 (17.18)                        | 17 (27.87)                          | 17 (40.48)                          | 53 (58.89)                           |                                     |
| Crude Model        | 1                                     | 1.267 (0.563-2.850)               | 2.359 (1.125-4.947)                 | 4.152 (1.895-9.904)                 | 8.745 (4.604-16.611)                 | 1.152 (1.097-1.210)                 |
| Model 1            | 1                                     | 1.272 (0.552-2.931)               | 2.770 (1.252-5.825)                 | 3.699 (1.633-8.379)                 | 8.417 (4.291-16.509)                 | 1.143 (1.087-1.202)                 |
| Model 2            | 1                                     | 1.243 (0.516-2.992)               | 2.763 (1.232-6.199)                 | 3.589 (1.509-8.533)                 | 7.854 (3.806-16.209)                 | 1.130 (1.072-1.191)                 |
| Model 3            | 1                                     | 1.225 (0.475-3.157)               | 2.659 (1.123-6.295)                 | 2.906 (1.147-7.358)                 | 3.639 (1.588-8.335)                  | 1.074 (1.020-1.132)                 |
| Model 4            | 1                                     | 1.304 (0.509-3.342)               | 2.590 (1.088-6.168)                 | 2.686 (1.030-7.007)                 | 3.541 (1.519-8.254)                  | 1.072 (1.017-1.130)                 |
| Death (n.%)        | 2 (1.48)                              | 3 (4.68)                          | 0 (0)                               | 4 (9.52)                            | 28 (31.11)                           |                                     |
| Crude Model        | 1                                     | 3.270 (0.533-20.078)              | NA                                  | 7.000 (1.235-39.692)                | 30.032 (6.934-130.079)               | 1.402 (1.241-1.585)                 |
| Model 1            | 1                                     | 3.042 (0.530-21.069)              | NA                                  | 5.590 (0.964-32.413)                | 25.777 (5.817-114.223)               | 1.377 (1.210-1.567)                 |
| Model 2            | 1                                     | 2.308 (0.298-17.856)              | NA                                  | 4.947 (0.807-30.337)                | 21.505 (4.679-98.851)                | 1.356 (1.179-1.562)                 |
| Model 3            | 1                                     | 3.339 (0.278-40.029)              | NA                                  | 9.199 (0.949-89.145)                | 11.967 (1.691-84.667)                | 1.235 (1.065-1.431)                 |
| Model 4            | 1                                     | 3.657 (0.318-42.100)              | NA                                  | 5.047 (0.513-49.618)                | 8.059 (1.197-54.274)                 | 1.177 (1.017-1.362)                 |

Model 1, adjusted for age, sex.

Model 2, adjusted for age, sex, current smoking, history of hypertension, atrial fibrillation, stroke, triglycerides.

Model 3, adjusted for Model 2 and further adjusted for admission NIHSS scores

Model 4, adjusted for Model 3 and further adjusted for ASPECTS scores.

**Supplementary Table 5.** Adjusted Odds Ratios of Adverse Outcomes According to Eosinophil changes After Intravenous Thrombolysis in 690 Patients with Follow-up Data.

| Outcomes     | Increase or no change | 0 < decrease ≤ 25%   | 25% < decrease ≤ 50% | 50% < decrease ≤ 75%  | 75% < decrease ≤ 100% | Each 10% decrease in Eosinophils |
|--------------|-----------------------|----------------------|----------------------|-----------------------|-----------------------|----------------------------------|
| Poor outcome |                       |                      |                      |                       |                       |                                  |
| Model 5      | 1                     | 0.905 (0.423-1.932)  | 1.756 (0.423-1.932)  | 2.321 (0.927-3.325)   | 2.991 (1.686-5.309)   | 1.053 (1.019-1.087)              |
| Model 6      | 1                     | 0.883 (0.428-1.822)  | 1.449 (0.785-2.674)  | 1.717 (0.866-3.405)   | 2.754 (1.556-4.875)   | 1.038 (1.006-1.071)              |
| Model 7      | 1                     | 0.868 (0.436-1.727)  | 1.375 (0.735-2.571)  | 1.408 (0.691-2.867)   | 2.641 (1.497-4.661)   | 1.014 (0.990-1.038)              |
| Death        |                       |                      |                      |                       |                       |                                  |
| Model 5      | 1                     | 5.496 (1.009-29.935) | 2.117 (0.335-13.371) | 10.201 (2.246-46.331) | 15.261 (3.671-63.454) | 1.193 (1.087-1.310)              |
| Model 6      | 1                     | 2.952 (0.826-10.553) | 0.974 (0.226-4.118)  | 2.453 (0.691-8.704)   | 6.119 (2.203-16.996)  | 1.126 (1.044-1.213)              |
| Model 7      | 1                     | 1.689 (0.512-5.571)  | 0.542 (0.100-2.937)  | 1.592 (0.454-5.576)   | 4.863 (1.916-12.345)  | 1.055 (0.998-1.115)              |

Model 5, adjusted for Model 3; replaced missing data with the lowest 25th percentile of the entire cohort.

Model 6, adjusted for Model 3; replaced missing data with the 50th percentile of the entire cohort.

Model 7, adjusted for Model 3; replaced missing data with the highest 25th percentile of the entire cohort.

**Supplementary Table 6.** Adjusted Odds Ratios of Adverse Outcomes According to Eosinophil changes After Intravenous Thrombolysis (Excluded Patients with Tirofiban)

| Outcomes           | Increase or<br>no change<br>(n = 222) | 0 < decrease<br>≤ 25%<br>(n = 84) | 25% < decrease<br>≤ 50%<br>(n = 101) | 50% < decrease<br>≤ 75%<br>(n = 61) | 75% < decrease<br>≤ 100%<br>(n = 136) | Each 10% decrease in<br>Eosinophils |
|--------------------|---------------------------------------|-----------------------------------|--------------------------------------|-------------------------------------|---------------------------------------|-------------------------------------|
| Poor outcome (n.%) | 33 (14.86)                            | 11 (13.10)                        | 23 (22.77)                           | 21 (34.43)                          | 71 (52.21)                            |                                     |
| Crude Model        | 1                                     | 0.863 (0.414-1.798)               | 1.689 (0.932-3.059)                  | 3.007 (1.578-5.729)                 | 6.256 (3.795-10.314)                  | 1.112 (1.073-1.154)                 |
| Model 1            | 1                                     | 0.858 (0.403-1.828)               | 1.784 (0.964-3.299)                  | 2.726 (1.390-5.349)                 | 5.966 (3.523-10.105)                  | 1.104 (1.063-1.147)                 |
| Model 2            | 1                                     | 0.762 (0.345-1.685)               | 1.761 (0.929-3.339)                  | 2.551 (1.257-5.178)                 | 5.429 (3.097-9.516)                   | 1.092 (1.051-1.135)                 |
| Model 3            | 1                                     | 0.655 (0.275-1.561)               | 1.587 (0.798-3.157)                  | 1.758 (0.808-3.826)                 | 2.536 (1.331-4.832)                   | 1.042 (1.004-1.082)                 |
| Death (n.%)        | 3 (1.35)                              | 4 (4.76)                          | 1 (1.00)                             | 5 (8.20)                            | 41 (30.15)                            |                                     |
| Crude Model        | 1                                     | 3.650 (0.799-16.667)              | 0.730 (0.075-7.105)                  | 6.518 (1.512-28.098)                | 31.505 (9.520-104.259)                | 1.341 (1.222-1.471)                 |
| Model 1            | 1                                     | 3.774 (0.796-17.887)              | 0.779 (0.078-7.731)                  | 5.704 (1.282-25.373)                | 29.657 (8.662-101.541)                | 1.321 (1.198-1.456)                 |
| Model 2            | 1                                     | 2.890 (0.535-15.614)              | 0.836 (0.083-9.436)                  | 5.435 (1.181-25.001)                | 28.256 (7.927-100.722)                | 1.307 (1.178-1.449)                 |
| Model 3            | 1                                     | 2.894 (0.443-18.891)              | 0.824 (0.070-9.696)                  | 4.590 (0.823-25.601)                | 14.910 (3.645-64.154)                 | 1.194 (1.073-1.329)                 |

Model 1, adjusted for age, sex.

Model 2, adjusted for age, sex, current smoking, history of hypertension, atrial fibrillation, stroke and triglycerides.

Model 3, adjusted for Model 2 and further adjusted for admission NIHSS scores.

**Supplementary Table 7.** Adjusted Odds Ratios of Adverse Outcomes at 3-month According to NLR

|                                      | Poor Outcome         |                | Death                |                |
|--------------------------------------|----------------------|----------------|----------------------|----------------|
|                                      | Odds ratios (95% CI) | <i>p</i> value | Odds ratios (95% CI) | <i>p</i> value |
| Admission NLR (per 1-point increase) |                      |                |                      |                |
| Crude Model                          | 1.060 (0.993-1.132)  | 0.079          | 1.100 (1.011-1.197)  | 0.027          |
| Model 1                              | 1.064 (0.993-1.141)  | 0.080          | 1.113 (1.014-1.222)  | 0.025          |
| Model 2                              | 1.070 (0.996-1.150)  | 0.064          | 1.123 (1.021-1.236)  | 0.017          |
| Model 3                              | 1.068 (0.988-1.154)  | 0.097          | 1.195 (1.068-1.338)  | 0.002          |
| 24 hours NLR (per 1-point increase)  |                      |                |                      |                |
| Crude Model                          | 1.265 (1.190-1.345)  | < 0.001        | 1.342 (1.250-1.440)  | < 0.001        |
| Model 1                              | 1.250 (1.170-1.335)  | < 0.001        | 1.312 (1.212-1.420)  | < 0.001        |
| Model 2                              | 1.251 (1.168-1.339)  | < 0.001        | 1.324 (1.217-1.441)  | < 0.001        |
| Model 3                              | 1.172 (1.089-1.260)  | < 0.001        | 1.278 (1.162-1.405)  | < 0.001        |
| Each 10% increase in NLR within 24h  |                      |                |                      |                |
| Crude Model                          | 1.029 (1.018-1.140)  | < 0.001        | 1.034 (1.021-1.047)  | < 0.001        |
| Model 1                              | 1.026 (1.015-1.038)  | < 0.001        | 1.028 (1.014-1.042)  | < 0.001        |
| Model 2                              | 1.026 (1.015-1.038)  | < 0.001        | 1.028 (1.014-1.043)  | < 0.001        |
| Model 3                              | 1.015 (1.002-1.027)  | 0.020          | 1.017 (1.001-1.034)  | 0.040          |
| NLR increase > 100% versus ≤ 100%    |                      |                |                      |                |
| Crude Model                          | 2.927 (2.018-4.247)  | < 0.001        | 5.139 (2.861-9.233)  | < 0.001        |
| Model 1                              | 2.755 (1.858-4.087)  | < 0.001        | 4.428 (2.364-8.293)  | < 0.001        |
| Model 2                              | 2.819 (1.875-4.236)  | < 0.001        | 4.336 (2.288-8.216)  | < 0.001        |
| Model 3                              | 1.924 (1.208-3.064)  | 0.006          | 2.378 (1.142-4.952)  | 0.021          |

Model 1, adjusted for age, sex.

Model 2, adjusted for age, sex, current smoking, history of hypertension, atrial fibrillation, stroke and triglycerides.

Model 3, adjusted for Model 2 and further adjusted for admission NIHSS scores.
