# Supplementary material for: Dynamic Decrease in Eosinophil After Intravenous Thrombolysis Predicts Poor Prognosis of Acute Ischemic Stroke: A Longitudinal Study
Source: PubMed Central journal article supplement (PMC8293745; doi:10.3389/fimmu.2021.709289), 2021-07-07
Supplement: DataSheet_2.pdf [file DataSheet_2.pdf]

### Supplementary Figure 1

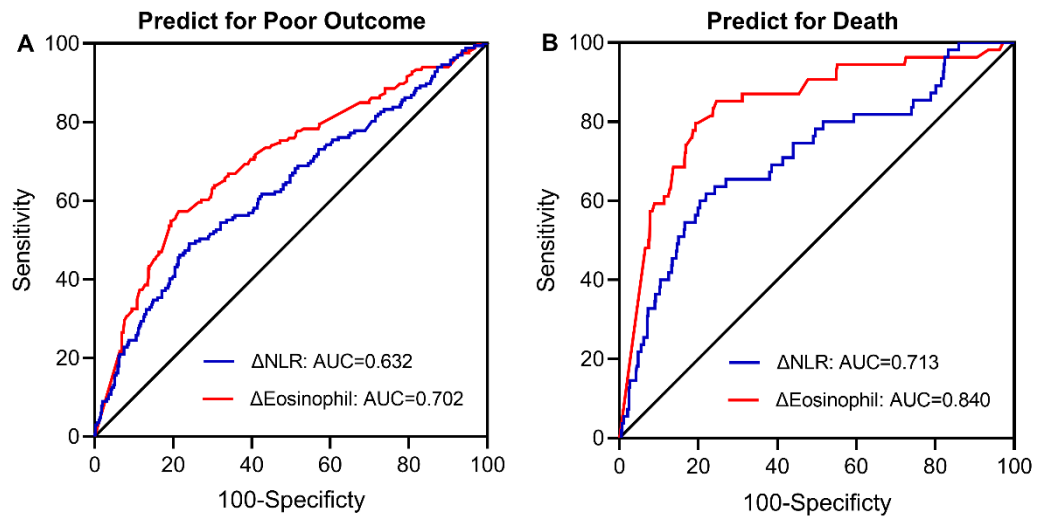

Receiver operating characteristic (ROC) curve for the value of eosinophil and NLR changes after intravenous thrombolysis to predict (A): Poor outcome; (B): Death. Dynamic eosinophil had higher predictive ability than dynamic NLR for poor 3-month outcome ( $p = 0.002$ ) and death ( $p < 0.001$ ).

Supplementary Figure 2

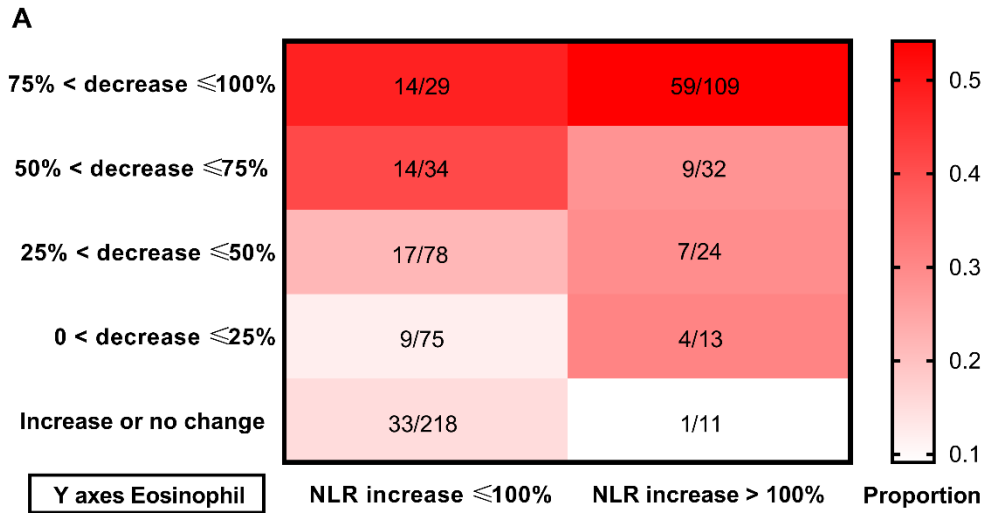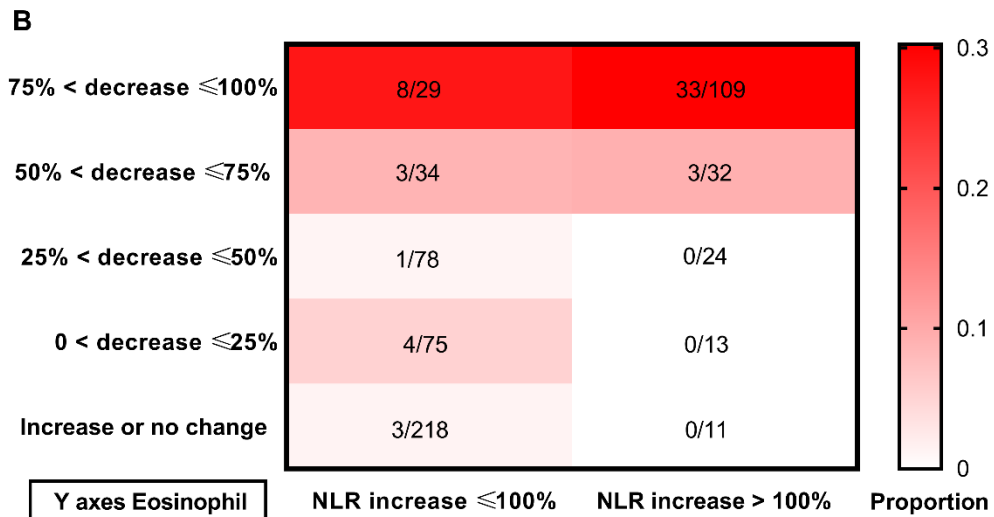

Heat maps of proportion for (A): Poor outcome; (B): Death in the 10 groups established using eosinophil and NLR changes after intravenous thrombolysis. Numbers in the right of / represent the total patients in the group while numbers in the left of / represent the outcome event cases in the group.
